# Supplementary material
Source: Springer Nature journal article supplement (https://www.springermedizin.de/resource/supplementary/12967_2008_310_MOESM1_ESM.pdf/9576178)
Supplement: MOESM1 [file 9576178]

**Additional file 1 – Amount of Gd-PAMAM dendrimer infused per Gd dose**

| Gd-dendrimer generation | 0.03 mmol Gd/kg bw (mg Gd-dendrimer) | 0.06 mmol Gd/kg bw (mg Gd-dendrimer) | 0.09 mmol Gd/kg bw (mg Gd-dendrimer) |
|-------------------------|--------------------------------------|--------------------------------------|--------------------------------------|
| G1                      | 32                                   | —                                    | 94                                   |
| G2                      | 32                                   | —                                    | 96                                   |
| G3                      | 37                                   | —                                    | 110                                  |
| Lowly conjugated G4     | 38                                   | —                                    | 115                                  |
| G4                      | 39                                   | —                                    | 118                                  |
| G5                      | 40                                   | —                                    | 119                                  |
| Rhodamine B G5          | —                                    | 96                                   | —                                    |
| G6                      | 40                                   | —                                    | 119                                  |
| G7                      | 39                                   | —                                    | 116                                  |
| G8                      | 46                                   | —                                    | 139                                  |
| Rhodamine B G8          | —                                    | 101                                  | —                                    |
